# Supplementary material for: Emergency department visits among patients transported by law enforcement officers
Source: PLoS One. 2021 Jan 13;16(1):e0244679. doi: 10.1371/journal.pone.0244679 (PMC7806121; doi:10.1371/journal.pone.0244679)
Supplement: S1 Table — *AHRQ Clinical Classification Software (CCS) groups 10–15: Diseases of the genitourinary system (10); Complications of pregnancy; childbirth; and the puerperium (11); Diseases of the skin and subcutaneous tissue (12); Diseases of the musculoskeletal system and connective tissue (13); Congenital anomalies (14); Certain conditions originating in the perinatal period (15). Note: excludes 18 observations that were missing transport month and year. (XLSX) [file pone.0244679.s002.xlsx]

## Sheet: S1 Table
S1 Table. Disease prevalence among adult emergency department patients
	transported by law enforcement, North Carolina, 2009-2016, stratified by ICD periods
		ICD-9 Coding					ICD-10 Coding
		January 1, 2009 - September 30, 2015					October 1, 2015- December 31, 2016
		N	%	L95% CI	U95% CI		N	%	L95% CI	U95% CI
Mental Illness		46425	42.22	41.93	42.51		12269	46.71	46.11	47.31
	Schizophrenia and other psychotic disorders	8196	7.45	7.3	7.61		2106	8.02	7.69	8.35
	Mood disorders	11066	10.06	9.89	10.24		2184	8.31	7.98	8.65
	Anxiety disorders	3330	3.03	2.93	3.13		629	2.39	2.21	2.58
	Screening and history of mental health and substance abuse codes	5428	4.94	4.81	5.06		489	1.86	1.7	2.03
	Alcohol-related disorders	5649	5.14	5.01	5.27		1433	5.46	5.18	5.73
	Substance-related disorders	4115	3.74	3.63	3.85		3310	12.6	12.2	13
	Suicide and intentional self-inflicted injury	4278	3.89	3.78	4		898	3.42	3.2	3.64
Injury and poisoning		15712	14.29	14.08	14.5		1219	4.64	4.39	4.9
	Open wounds	4570	4.16	4.04	4.27		319	1.21	1.08	1.35
	Poisoning	894	0.81	0.76	0.87		49	0.19	0.13	0.24
	Superficial injury; contusion	3526	3.21	3.1	3.31		238	0.91	0.79	1.02
Diseases groups 10-15*		6326	5.75	5.62	5.89		1109	4.22	3.98	4.47
Diseases of the blood and blood-forming organs		435	0.4	0.36	0.43		294	1.12	0.99	1.25
Diseases of the circulatory system		4585	4.17	4.05	4.29		1010	3.85	3.61	4.08
Diseases of the digestive system		1946	1.77	1.69	1.85		402	1.53	1.38	1.68
Diseases of the nervous system and sense organs		2859	2.6	2.51	2.69		644	2.45	2.26	2.64
Diseases of the respiratory system		2150	1.96	1.87	2.04		284	1.08	0.96	1.21
Endocrine; nutritional; and metabolic diseases and immunity disorders		2365	2.15	2.07	2.24		1194	4.55	4.29	4.8
Infectious and parasitic diseases		771	0.7	0.65	0.75		419	1.6	1.44	1.75
Neoplasms		151	0.14	0.12	0.16		65	0.25	0.19	0.31
Residual codes; unclassified; all E codes		2586	2.35	2.26	2.44		2483	9.45	9.1	9.81
Symptoms; signs; and ill-defined conditions and factors influencing health status		11825	10.75	10.57	10.94		1361	5.18	4.91	5.45
Missing		11819	10.75	10.57	10.93		3514	13.38	12.97	13.79
*AHRQ Clinical Classification Software (CCS) groups 10-15: Diseases of the genitourinary system (10);
*AHRQ Clinical Classificaiton Software (CCS) groups 10-15: Diseases of the genitourinary system (10);
*AHRQ Clinical Classificaiton Software (CCS) groups 10-15: Diseases of the genitourinary system (10);
*AHRQ Clinical Classificaiton Software (CCS) groups 10-15: Diseases of the genitourinary system (10);
*AHRQ Clinical Classificaiton Software (CCS) groups 10-15: Diseases of the genitourinary system (10);
